# Supplementary material for: Perception of Healthcare Professionals towards Electronic-Prescribing at University of Gondar Comprehensive Specialized Hospital, Northwest Ethiopia: A Cross-Sectional Study
Source: Hindawi journal article supplement (doi:10.1155/2024/6553470), 2024-04-09
Supplement: f1 [file 6553470.f1.pdf]

Health professionals involved in prescribing at UoGCSH  
(1174)

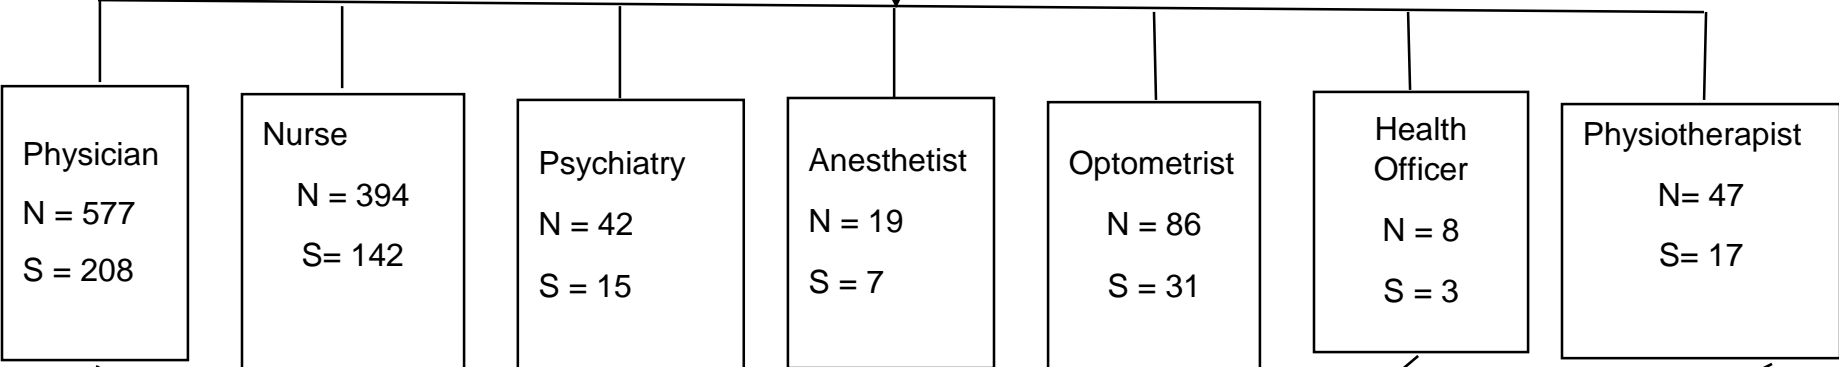

Sample = 423
